# Supplementary material
Source: ML conference proceedings conference paper supplement (https://openaccess.thecvf.com/content/ICCV2023/html/Yu_Aggregating_Feature_Point_ICCV_2023_paper.html)
Supplement: Supplementary file 1 [file Yu_Aggregating_Feature_Point_ICCV_2023_supplemental.pdf]

# Aggregating Feature Point Cloud for Depth Completion

## Supplementary Materials

Zhu Yu<sup>1</sup>, Zehua Sheng<sup>1</sup>, Zili Zhou<sup>1</sup>, Lun Luo<sup>1</sup>,  
Si-Yuan Cao<sup>2,1\*</sup>, Hong Gu<sup>4</sup>, Huaqi Zhang<sup>4</sup>, Hui-Liang Shen<sup>1,3\*</sup>

<sup>1</sup>College of Information Science and Electronic Engineering, Zhejiang University

<sup>2</sup>Ningbo Innovation Center, Zhejiang University

<sup>3</sup>Key Laboratory of Collaborative Sensing and Autonomous Unmanned Systems of Zhejiang Province

<sup>4</sup>vivo Mobile Communication Company Ltd.

{yu\_zhu, shengzehua, zhou\_zili, luolun, cao\_siyuan, shenhl}@zju.edu.cn

{guhong, zhanghuaqi}@vivo.com

The supplementary materials provide more experimental details and more visualization results.

### 1. Detailed Metrics

In our paper, we adopt eight standard metrics for evaluation, including RMSE, MAE, iRMSE, iMAE, REL,  $\delta_i (i = 1.25, 1.25^2, 1.25^3)$ . Formally, the metrics are defined as follows:

- Root mean square error (RMSE):

$$\sqrt{\frac{1}{|\mathcal{V}|} \sum_{\mathbf{x} \in \mathcal{V}} (\hat{\mathbf{D}}(\mathbf{x}) - \mathbf{D}(\mathbf{x}))^2} \quad (1)$$

- Mean absolute error (MAE):

$$\frac{1}{|\mathcal{V}|} \sum_{\mathbf{x} \in \mathcal{V}} |\hat{\mathbf{D}}(\mathbf{x}) - \mathbf{D}(\mathbf{x})| \quad (2)$$

- Root mean square error of the inverse depth (iRMSE):

$$\sqrt{\frac{1}{|\mathcal{V}|} \sum_{\mathbf{x} \in \mathcal{V}} \left( \frac{1}{\hat{\mathbf{D}}(\mathbf{x})} - \frac{1}{\mathbf{D}(\mathbf{x})} \right)^2} \quad (3)$$

- Mean absolute error of the inverse depth (iMAE):

$$\frac{1}{|\mathcal{V}|} \sum_{\mathbf{x} \in \mathcal{V}} \left| \frac{1}{\hat{\mathbf{D}}(\mathbf{x})} - \frac{1}{\mathbf{D}(\mathbf{x})} \right| \quad (4)$$

- Mean relative error (REL):

$$\frac{1}{|\mathcal{V}|} \sum_{\mathbf{x} \in \mathcal{V}} \frac{|\hat{\mathbf{D}}(\mathbf{x}) - \mathbf{D}(\mathbf{x})|}{\mathbf{D}(\mathbf{x})} \quad (5)$$

- Thresholded accuracy ( $\delta_i (i = 1.25, 1.25^2, 1.25^3)$ )

$$\max \left( \frac{\hat{\mathbf{D}}(\mathbf{x})}{\mathbf{D}(\mathbf{x})}, \frac{\mathbf{D}(\mathbf{x})}{\hat{\mathbf{D}}(\mathbf{x})} \right) < 1.25^i \quad (6)$$

where  $\mathbf{D}$  and  $\hat{\mathbf{D}}$  refer to ground truth depth map and predicted depth map, respectively;  $\mathbf{x}$  denotes the indexes of depth map;  $\mathcal{V}$  represents the set of valid pixels in  $\mathbf{D}$ ;  $|\mathcal{V}|$  is the number of valid pixels.

### 2. Camera Models

Let denote the image coordinate of an pixel as  $\mathcal{C} = (u_i, v_i)$ , whose corresponding depth value is  $d_i$ , and the coordinate in the 3D world system as  $\mathcal{P} = (x_i, y_i, z_i)$ . Denoting the camera intrinsic matrix as  $K \in \mathbb{R}^{4 \times 4}$ , then  $\mathcal{C}$  can be transformed to  $\mathcal{P}$  as follows

$$[x_i, y_i, z_i, 1]^T = K^{-1} \cdot [u_i \times d_i, v_i \times d_i, d_i, 1]^T. \quad (7)$$

### 3. More Qualitative Comparison Results

In this section, we provide more visualization results for qualitative comparison analysis.

### References

- [1] Xinjing Cheng, Peng Wang, and Ruigang Yang. Depth estimation via affinity learned with convolutional spatial propagation network. In *Proceedings of the European Conference on Computer Vision*, pages 103–119, 2018. [2, 3, 4](#)
- [2] Mu Hu, Shuling Wang, Bin Li, Shiyu Ning, Li Fan, and Xiaojin Gong. Towards precise and efficient image guided depth completion. 2021. [3, 4](#)
- [3] Jaewon Kam, Jungeon Kim, Soongjin Kim, Jaesik Park, and Seungyong Lee. Costdcnet: Cost volume based depth completion for a single rgb-d image. In *Proceedings of the European*

\*Corresponding author.

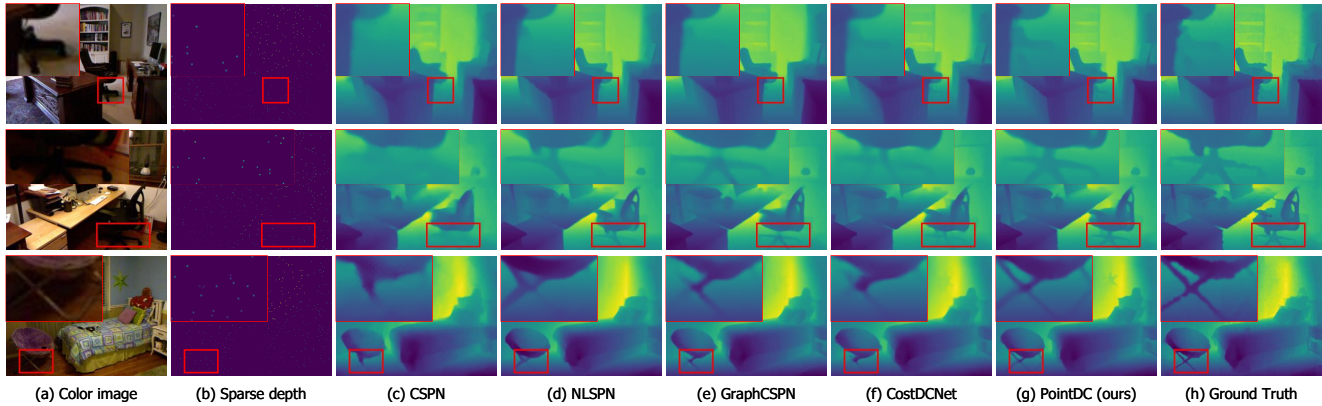

Figure 1. **Qualitative depth completion results on the NYU Depth V2 dataset [6] with 500 sampling points.** (a) Color image, (b) Sparse depth, (c) CSPN [1], (d) NLSPN [5], (e) GraphCSPN [4], (f) CostDCNet [3], (g) PointDC (ours), (h) Ground truth.

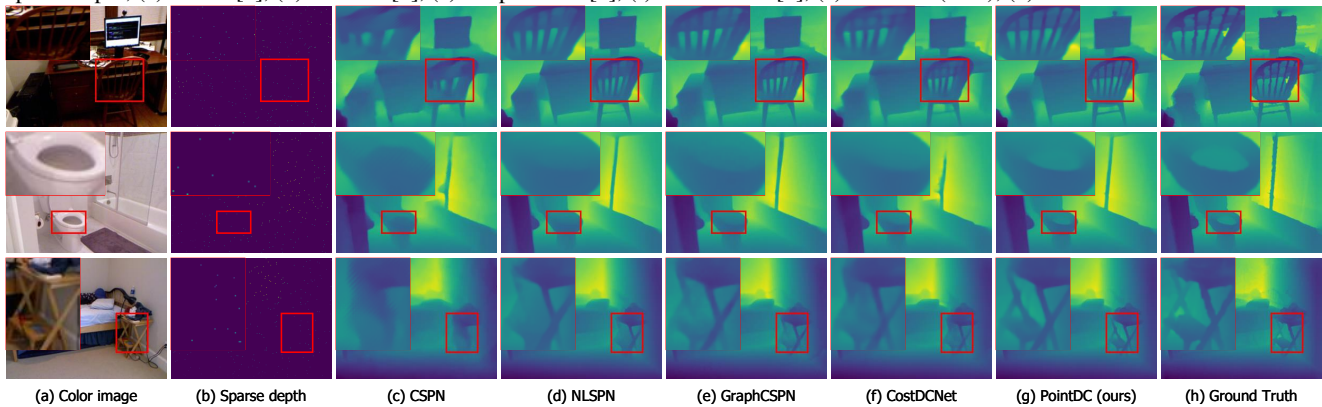

Figure 2. **Qualitative depth completion results on the NYU Depth V2 dataset [6] with 300 sampling points.** (a) Color image, (b) Sparse depth, (c) CSPN [1], (d) NLSPN [5], (e) GraphCSPN [4], (f) CostDCNet [3], (g) PointDC (ours), (h) Ground truth.

*Conference on Computer Vision*, pages 257–274, 2022. 2, 3, 4

- [4] Xin Liu, Xiaofei Shao, Bo Wang, Yali Li, and Shengjin Wang. Graphcspn: Geometry-aware depth completion via dynamic gcns. In *Proceedings of the European Conference on Computer Vision*, pages 90–107, 2022. 2, 3, 4
- [5] Jinsun Park, Kyungdon Joo, Zhe Hu, Chi-Kuei Liu, and In So Kweon. Non-local spatial propagation network for depth completion. In *Proceedings of the European Conference on Computer Vision*, pages 120–136, 2020. 2, 3, 4
- [6] Nathan Silberman, Derek Hoiem, Pushmeet Kohli, and Rob Fergus. Indoor segmentation and support inference from rgb-d images. *Proceedings of the European Conference on Computer Vision*, 7576:746–760, 2012. 2, 3, 4
- [7] Jie Tang, Fei-Peng Tian, Wei Feng, Jian Li, and Ping Tan. Learning guided convolutional network for depth completion. *IEEE Transactions on Image Processing*, 30:1116–1129, 2020. 3, 4
- [8] Jonas Uhrig, Nick Schneider, Lukas Schneider, Uwe Franke, Thomas Brox, and Andreas Geiger. Sparsity invariant cnns. In *International Conference on 3D Vision*, 2017. 3, 4
- [9] Shanshan Zhao, Mingming Gong, Huan Fu, and Dacheng Tao. Adaptive context-aware multi-modal network for depth completion. *IEEE Transactions on Image Processing*, 30:5264–5276, 2021. 3, 4

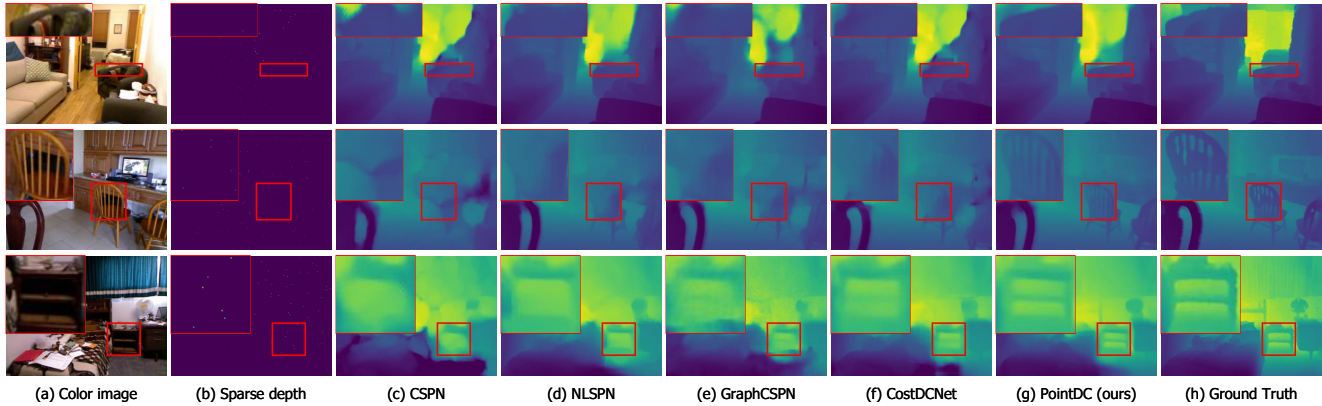

Figure 3. **Qualitative depth completion results on the NYU Depth V2 dataset [6] with 100 sampling points.** (a) Color image, (b) Sparse depth, (c) CSPN [1], (d) NLSPN [5], (e) GraphCSPN [4], (f) CostDCNet [3], (g) PointDC (ours), (h) Ground Truth.

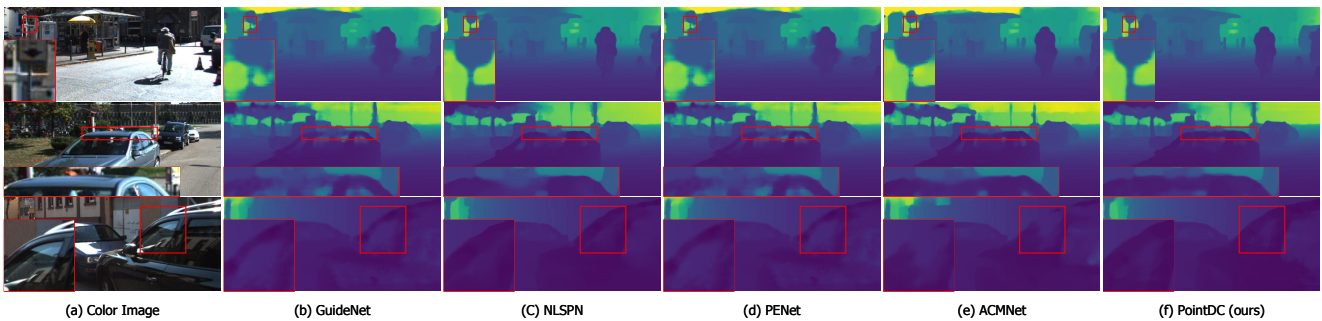

Figure 4. **Qualitative depth completion results on the KITTI DC Dataset [8] with sampling ratio as 1.** (a) Color image, (b) GuideNet [7], (c) NLSPN [5], (d) PENet [2], (e) ACMNet [9], (f) PointDC (ours).

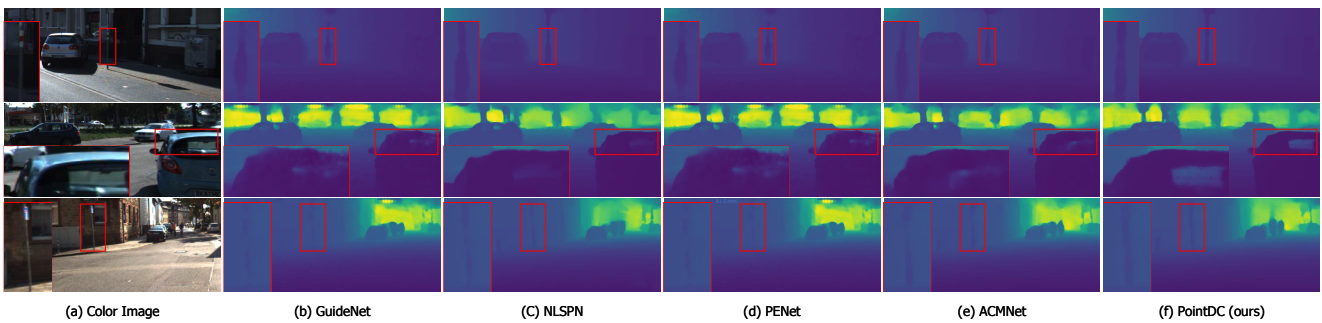

Figure 5. **Qualitative depth completion results on the KITTI DC Dataset [8] with sampling ratio as 0.4.** (a) Color image, (b) GuideNet [7], (c) NLSPN [5], (d) PENet [2], (e) ACMNet [9], (f) PointDC (ours).

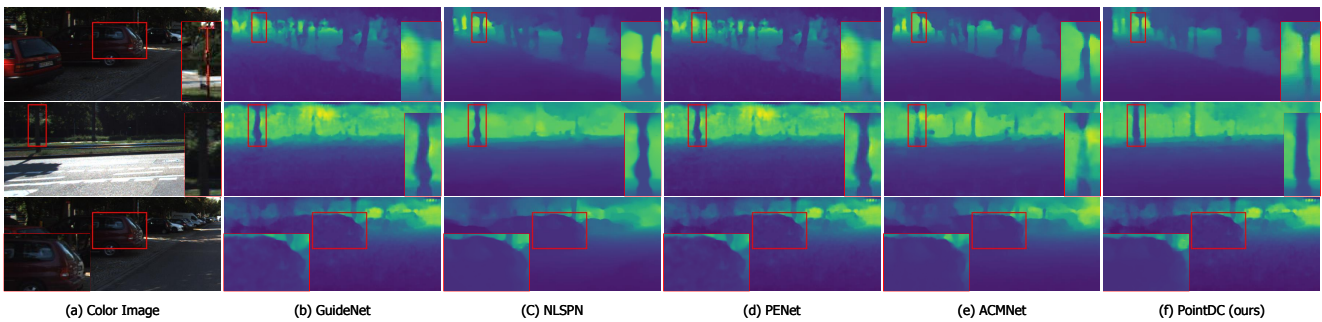

Figure 6. **Qualitative depth completion results on the KITTI DC Dataset [8] with sampling ratio as 0.1.** (a) Color image, (b) GuideNet [7], (c) NLSPN [5], (d) PENet [2], (e) ACMNet [9], (f) PointDC (ours).



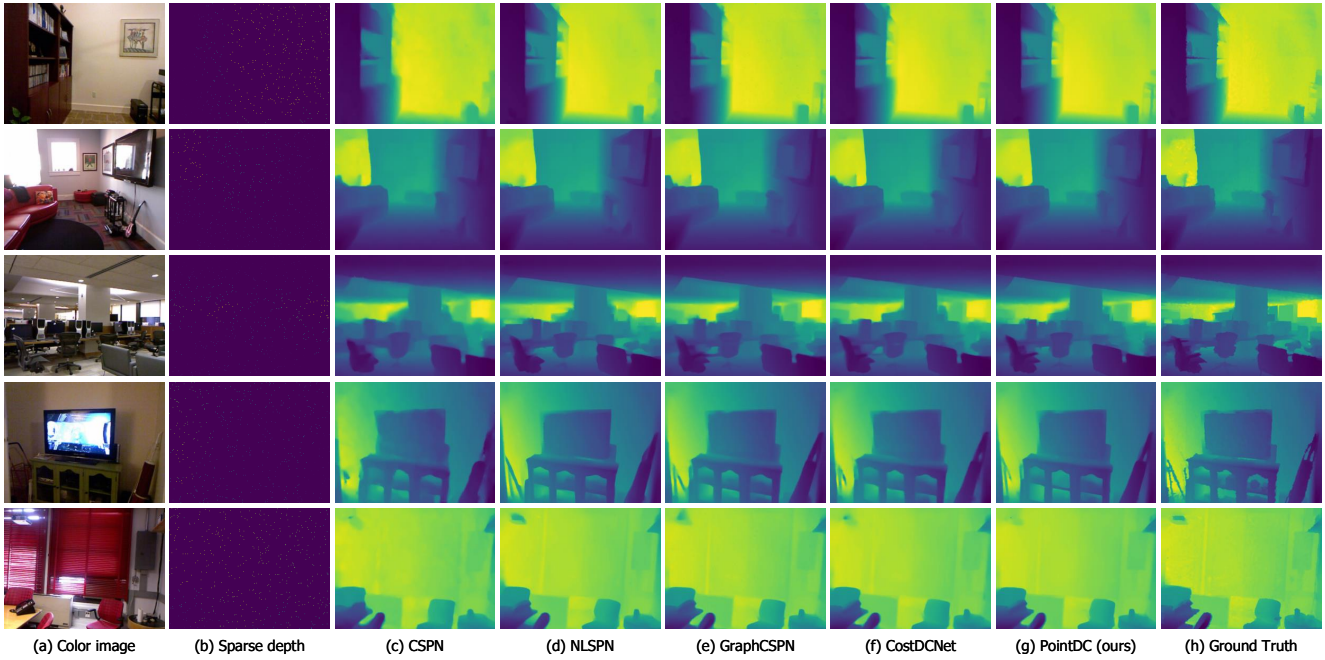

Figure 7. **More qualitative depth completion results on the NYU Depth V2 dataset [6].** (a) Color image, (b) Sparse depth, (c) CSPN [1], (d) NLSPN [5], (e) GraphCSPN [4], (f) CostDCNet [3], (g) PointDC (ours), (h) Ground truth.

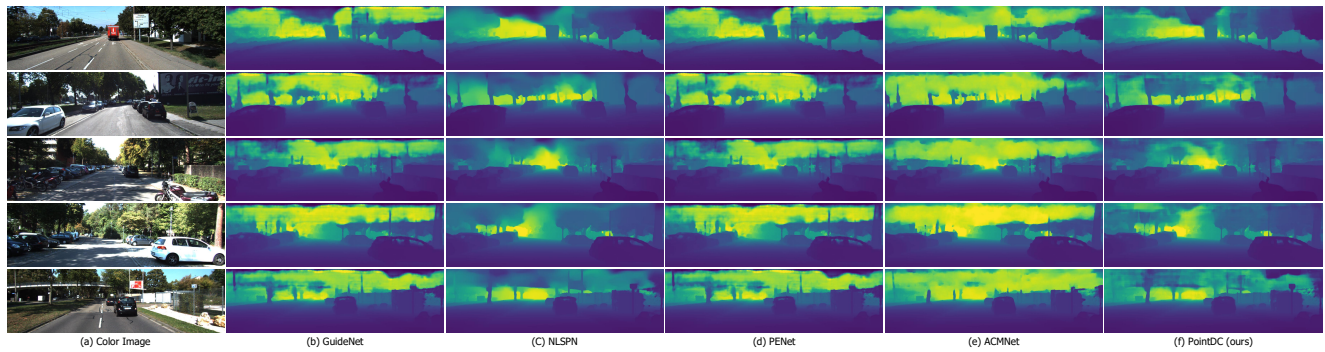

Figure 8. **More qualitative depth completion results on the KITTI DC Dataset [8].** (a) Color image, (b) GuideNet [7], (c) NLSPN [5], (d) PENet [2], (e) ACMNet [9], (f) PointDC (ours).
